# Supplementary material for: A convergent approach to huperzine A and analoguesElectronic supplementary information (ESI) available: further experimental details. See http://www.rsc.org/suppdata/ob/b3/b305869g/
Source: Royal Society of Chemistry journal article supplement (doi:10.1039/b305869g), 2003-01-01
Supplement: b305869g.doc [file b305869g.doc]

# A convergent approach to huperzine A and analogues

# Seán A. Kellya, Yann Forichera, John Manna*, and Jonathan M. Bentleyb

# *a Schoool of Chemistry, Queen's University Belfast, Stranmillis Road, Belfast BT9 5AG, Northern Ireland*

# *b Vernalis Research Ltd, Oakdene Court, 613 Reading Road, Winnersh, Wokingham RG41 5UA, England*

# Supplementary data

# Syntheses of aldol adducts

*n*-BuLi (2.5M in hexane, 1.1eq.) was added to a solution of diisopropylamine (1.1eq.) in dry THF at 0°C. The reaction mixture was stirred at 0C for 1h and cooled to -78C.

Cyclohex-2-enone (1.1eq.) was added dropwise to the cold solution of lithium diisopropylamine (1.1eq.) and the mixture was stirred at -78°C for 1h. The aldehyde in dry THF was then added to the solution and the solution was stirred for 1h. A saturated aqueous solution of ammonium chloride was added to the reaction mixture at -78°C. The resulting solution was allowed to warm to room temperature and then extracted with Et2O. The combined organic extracts were washed with a saturated aqueous solution of sodium bicarbonate, brine and dried over MgSO4. The solvent was removed under reduced pressure and the crude oil was purified by flash chromatography to produce a mixture of aldol adducts or the *syn*-adduct and the *anti*-adduct separately according to the feasibility of the separation of two isomers.

When the two isomers could not be separated by chromatography, the ratio was determined from the integration values of the 7-H protons in the 1H NMR spectrum and assignments for the discrete signals are then given where possible.

**6-[(2-Bromophenyl)-hydroxymethyl]cyclohex-2-enone** **(6a).**

2-Bromobenzaldehyde (1.80 mL, 15.42 mmol) with a solution of lithium diisopropylamide [*n*-BuLi (6.78 mL, 16.96 mmol), diisopropylamine (2.38 mL, 16.96 mmol)] and cyclohex-2-enone (1.64 mL, 16.96 mmol) in dry THF (65 mL) yielded, after flash chromatography (20-50% diethyl ether-petroleum ether solvent gradient), a *syn*:*anti* mixture of aldol products as a yellow oil (3:2, 14.88 g, 88%).

max/cm-1 3456, 2932, 1658, 1466; H (400 MHz; CDCl3) 1.54 (m, 5-H*anti*), 1.62 (m, 5-H*syn*), 1.86 (m, 5-H*anti*), 2.05 (m, 5-H*syn*), 2.30 (4H, m, 4-H*syn* and 4-H*anti*), 2.60 (m, 6-H*anti*), 2.78 (s, OH*syn*), 2.87 (ddd, *J* 2.4, 4.4 and 13.8 Hz, 6-H*syn*), 4.84 (s, OH*anti*), 5.39 (d, *J* 8.8 Hz, 7-H*anti*), 5.91 (s, 7-H*syn*), 6.10 (2H, ddd, *J* 1.2, 2.7 and 10 Hz, 2-H), 6.98 (m, 3-H*syn*), 7.03 (m, 3-H*anti*), 7.14 (2H, ddd, *J* 0.4, 1.7 and 7.8 Hz, 2Har), 7.35 (2H, ddd, *J* 0.4, 1.7 and 7.5 Hz, 2Har), 7.52 (2H, dd, *J* 1.7 and 7.8 Hz, 2Har), 7.59 (2H, ddd, *J* 0.4, 1.7 and 7.5 Hz, 2Har); C (100 MHz; CDCl3) 21.0 (CH2, 5-C*syn*), 25.1 (CH2, 5-C*anti*), 25.8 (CH2, 4-C*syn*), 26.0 (CH2, 4-C*anti*), 50.2 (CH, 6-C*syn*), 53.4 (CH, 6-C*anti*), 69.6 (CH, 7-C*syn*), 73.3 (CH, 7-C*anti*), 121.0 (C, Car), 123.6 (C, Car), 127.1 (CH, Car), 128.0 (CH, Car), 128.6 (CH, Car), 128.7 (CH, Car), 129.2 (CH, Car), 129.5 (CH, Car), 130.0 (CH, 2-C*syn* and 2-C*anti*), 132.4 (CH, Car), 132.6 (CH, Car), 140.5 (C, 2  Car), 150.9 (CH, 3-C*syn*), 151.8 (CH, 3-C*anti*), 200.8 (C, 1-C*syn*), 203.5 (C, 1-C*anti*); *m*/z (CI) 280 (MH+, 23%), 263 (44), 201 (37), 183 (57), 96 (100), 68 (37); C13H14BrO2 [MH+ and 79Br] *required* 281.0178, found 281.0181.

#### 6-[(2-Iodophenyl)-hydroxymethyl]cyclohex-2-enone (6b).

2-Iodobenzaldehyde (2.08 g, 8.98 mmol) with a solution of lithium diisopropylamide [*n*-BuLi (3.95 mL, 9.88 mmol), diisopropylamine (1.38 mL, 9.88 mmol)] and cyclohex-2-enone (0.96 mL, 9.88 mmol) in dry THF (38 mL) afforded, after flash chromatography (10-50% diethyl ether-petroleum ether solvent gradient), a *syn*:*anti* mixture of aldol products (4:1, 2.67 g, 91%) as a yellow oil.

max/cm-1 3445, 2922, 1662, 1459; H (250 MHz; CDCl3) 1.55 (2H, m, 5-H*syn* and 5-H*anti*), 1.92 (1H, m, 5-H*anti*), 2.04 (1H, m, 5-H*syn*), 2.32 (4H, m, 4-H*syn* and 4-H*anti*), 2.60 (1H, m, 6-H*anti*), 2.85 (1H, m, 6-H*syn*), 5.23 (d, *J* 8.8 Hz, 7-H*anti*), 5.76 (1H, m, 7-H*syn*), 6.10 (2H, m, 2-H*syn* and 2-H*anti*), 6.99 (4H, m, 3-H*syn*, 3-H*anti*, and Har), 7.38 (2H, m, Har), 7.51(2H, m, Har), 7.82 (2H, m, Har); C (62.5 MHz; CDCl3) 20.9 (CH2, 5-C*syn*), 25.3 (CH2, 5-C*anti*), 25.8 (CH2, 4-C*syn*), 26.1 (CH2, 4-C*anti*), 50.2 (CH, 6-C*syn*), 53.7 (CH, 6-C*anti*), 73.7 (CH, 7-C*syn*), 78.1 (CH, 7-C*anti*), 96.5 (C, Car), 99.8 (C, Car), 127.9 (CH, 2-C*syn*), 128.3 (CH, 2-C*anti*), 128.7 (CH, Car), 128.9 (CH, Car), 129.0 (CH, Car), 129.5 (CH, Car), 129.7 (CH, Car), 130.0 (CH, Car), 139.2 (CH, Car), 139.3 (CH, Car), 143.2 (C, Car), 143.5 (C, Car), 150.9 (CH, 3-C*syn*), 151.8 (CH, 3-C*anti*), 200.6 (C, 1-C*syn*), 203.4 (C, 1-C*anti*); *m*/z (CI) 329 (MH+, 42%), 311(19), 232 (100), 201 (59), 183 (88), 97 (31). C13H14IO2 [MH+] *required* 329.0038, found 329.0034.

**6-[(3-Bromo-6-methoxy-2-pyridinyl)-hydroxymethyl]cyclohex-2-enone (8).**

3-Bromo-2-formyl-6-methoxypyridine **3** (1.45 g, 6.69 mmol) with a solution of lithium diisopropylamide [*n*-BuLi (2.94 mL, 7.36 mmol), diisopropylamine (1.03 mL, 7.36 mmol)] and cyclohex-2-enone (0.71 mL, 7.36 mmol) in dry THF (40 mL) provided, after flash chromatography (10-50% diethyl ether-petroleum ether solvent gradient), separately the *syn*-isomer (0.34 g, 17%) and the *anti*-isomer (0.83 g, 42%) as yellow oils. max/cm-1 3448, 2946, 1668, 1579, 1465, 1404.

*syn*-Isomer: H (250 MHz; CDCl3) 1.59 (1H, m, 5-H), 2.09 (1H, m, 5-H), 2.35 (2H, m, 4-H), 2.86 (1H, m, 6-H), 3.93 (3H, s, OC*H*3), 4.28 (1H, br s, O*H*), 5.78 (1H, d, *J* 2.2 Hz, 7-H), 6.13 (1H, d, *J* 2.2 Hz, 2-H), 6.62 (1H, d, *J* 8.6 Hz, 5’-H), 6.96 (1H, m, 3-H), 7.70 (1H, d, *J* 8.6 Hz, 4’-H); C (62.5 MHz; CDCl3) 21.3 (CH2, 5-C), 25.2 (CH2, 4-C), 50.1 (CH, 6-C), 53.9 (CH3, O*C*H3), 69.2 (CH, 7-C), 109.4 (C, 3’-C), 111.5 (CH, 5’-C), 130.4 (CH, 2-C), 143.4 (CH, 4’-C), 149.9 (CH, 3-C), 155.1 (C, 2’-C), 162.1 (C, 6’-C), 198.4 (C, 1-C); *m*/z (CI) 312 (88%), 216 (100), 188 (38), 97 (58), 68 (39); C13H15BrNO3 [MH+ and 79Br] *required* 312.0235, found 312.0229.

*anti*-Isomer: H (250 MHz; CDCl3) 1.90 (2H, m, 5-H), 2.45 (2H, m, 4-H), 3.12 (1H, m, 6-H), 3.95 (3H, s, OC*H*3), 4.66 (1H, br s, O*H*), 5.22 (1H, d, *J* 6.8 Hz, 7-H), 6.04 (1H, ddd, *J* 1.5, 2.5 and 10.0 Hz, 2-H), 6.60 (1H, d, *J* 8.7 Hz, 5’-H), 7.01 (1H, m, 3-H), 7.68 (1H, d, *J* 8.7 Hz, 4’-H); C (62.5 MHz; CDCl3) 25.5 (CH2, 5-C), 25.8 (CH2, 4-C), 50.3 (CH, 6-C), 53.8 (CH3, O*C*H3), 72.9 (CH, 7-C), 111.1 (C, 3’-C), 112.1 (CH, 5’-C), 130.0 (CH, 2-C), 142.9 (CH, 4’-C), 150.8 (CH, 3-C), 154.0 (C, 2’-C), 162.6 (C, 6’-C), 201.9 (C, 1-C); *m*/z (CI) 312 (39%), 216 (100), 188 (15), 97 (86), 68 (56); C13H15BrNO3 [MH+ and 79Br] *required* 312.0235, found 312.0240.

#### Syntheses of silyl ethers

*Tert*-butyldimethylsilyl trifluoromethane sulfonate (TBSOTf) was added to a solution of the alcohol and triethylamine in dry THF at 0°C. The reaction mixture was stirred at 0°C between 20 min and 2 h, and monitored by TLC. Methanol was added to quench the reaction and the solvent was removed under reduced pressure. The crude residue was taken up in a mixture of diethyl ether and water, and the two layers were separated. The aqueous phase was further extracted with diethyl ether. The combined organic extracts were washed with a saturated aqueous solution of sodium bicarbonate, brine and dried over MgSO4. The solvent was removed under reduced pressure and the crude oil was purified by flash chromatography to produce the silyl ether.

**6-[(2-Bromophenyl)-*tert*-butyldimethylsilyloxymethyl]-cyclohex-2-enone (9a)**

A *syn/anti* mixture of 6-[(2-bromophenyl)-hydroxymethyl]-cyclohex-2-enone **6a** (0.76 g, 2.71 mmol) with TBSOTf (1.25 mL, 5.43 mmol) and Et3N (0.95 mL, 6.78 mmol) in dry THF (8 mL) provided after separation by flash chromatography (5-20% diethyl ether-petroleum ether solvent gradient), the *syn*-silyl ether as a white solid (0.47 g, 43%) and the *anti*-silyl ether as a colourless oil (0.30 g, 28%). max/cm-1 3032, 2928, 1677, 1622, 1436. *m*/z (CI) 397 (MH+,4%), 339 (100), 301 (53), 263 (29), 183 (30), 153 (75), 74 (29); C19H28BrO2Si [MH+ and 81Br] *required* 397.1021, found 397.1003.

*syn-*Isomer: mp: 89-91C (CHCl3); H (400 MHz; CDCl3) -0.33 (3H, s, SiC*H*3), -0.01 (3H, s, SiC*H*3), 0.78 (9H, s, SiC(C*H*3)3), 1.62 (1H, m, 5-H), 2.10 (2H, m, 4-H and 5-H), 2.34 (1H, m, 4-H), 2.46 (1H, m, 6-H), 5.87 (1H, d, *J* 1.9 Hz, 7-H), 6.00 (1H, ddd, *J* 1.2, 2.5 and 10.0 Hz, 2-H), 6.98 (1H, m, 3-H), 7.11 (1H, ddd, *J* 0.4, 1.8 and 7.3 Hz, Har), 7.31 (1H, ddd, *J* 0.4, 1.3 and 7.3 Hz, Har), 7.50 (1H, dd, *J* 1.3 and 7.9 Hz, Har), 7.54 (1H, dd, *J* 1.8 and 7.9 Hz, Har); C (100 MHz; CDCl3) -5.3 (CH3, Si*C*H3), -4.7 (CH3, Si*C*H3), 18.1 (C, Si*C*(CH3)3), 20.4 (CH2, 5-C), 25.4 (CH2, 4-C), 25.8 (CH3, SiC(*C*H3)3), 51.1 (CH, 6-C), 70.8 (CH, 7-C), 121.0 (C, Car), 126.7 (CH, Car), 128.5 (CH, Car), 129.2 (CH, Car), 130.4 (CH, 2-C), 132.6 (CH, Car), 142.2 (C, Car), 150.2 (CH, 3-C), 198.0 (C, 1-C).

*anti*-Isomer:H (250 MHz; CDCl3) -0.28 (3H, s, SiC*H*3), -0.01 (3H, s, SiC*H*3), 0.75 (9H, s, SiC(C*H*3)3), 1.75 (2H, m, 5-H), 2.26 (1H, m, 4-H), 2.66 (1H, m, 4-H), 2.70 (1H, m, 6-H), 5.30 (1H, d, *J* 7.3 Hz, 7-H), 5.96 (1H, dt, *J* 2.1 and 10.1 Hz, 2-H), 6.83 (1H, m, 3-H), 7.07 (1H, dt, *J* 1.7 and 7.5 Hz, Har), 7.28 (1H, dt, *J* 1.2 and 7.5 Hz, Har), 7.43 (1H, dd, *J* 1.2 and 7.9 Hz, Har), 7.54 (1H, dd, *J* 1.7 and 7.9 Hz, Har); C (62.5 MHz; CDCl3) -5.1 (CH3, Si*C*H3), -4.8 (CH3, Si*C*H3), 18.0 (C, Si*C*(CH3)3), 24.8 (CH2, 5-C), 25.2 (CH2, 4-C), 25.7 (CH3, SiC(*C*H3)3), 54.5 (CH, 6-C), 73.2 (CH, 7-C), 122.6 (C, Car), 127.6 (CH, Car), 129.0 (CH, Car), 129.7 (CH, Car), 129.8 (CH, 2-C), 132.2 (CH, Car), 142.6 (C, Car), 148.6 (CH, 3-C), 198.9 (C, 1-C).

**6-[(2-Iodophenyl)-*tert*-butyldimethylsilyloxymethyl]-cyclohex-2-enone** **(9b)**

A *syn/anti* mixture of 6-[(2-iodophenyl)-hydroxymethyl]-cyclohex-2-enone(**6b**) (2.67 g, 8.15 mmol) with TBSOTf (3.74 mL, 16.30 mmol) and Et3N (2.84 mL, 20.37 mmol) in dry THF (25 mL) yielded after separation by flash chromatography (5-20% diethyl ether-petroleum ether solvent gradient) the *syn*-silyl ether as a white solid (1.04 g, 29%) and the *anti*-silyl ether as a colourless oil (0.46 g, 13%). max/cm-12952, 1677, 1471.

*syn*-Isomer:H (250 MHz; CDCl3) -0.30 (3H, s, SiC*H*3), 0.00 (3H, s, SiC*H*3), 0.77 (9H, s, SiC(C*H*3)3), 1.67 (1H, m, 5-H), 2.09 (2H, m, 4-H and 5-H), 2.39 (2H, m, 4-H and 6-H), 5.70 (1H, d, *J* 1.7 Hz, 7-H), 6.00 (1H, m, 2-H), 6.88 (2H, m, 3-H and Har), 7.26 (1H, dd, *J* 1.8 and 7.7 Hz, Har), 7.40 (1H, dd, *J* 1.8 and 7.9 Hz, Har), 7.71 (1H, dd, *J* 1.2 and 7.9 Hz, Har); C (62.5 MHz; CDCl3) -5.3 (CH3, Si*C*H3), -4.7 (CH3, Si*C*H3), 18.1 (C, Si*C*(CH3)3), 20.2 (CH2, 5-C), 25.4 (CH2, 4-C), 25.9 (CH3, SiC(*C*H3)3), 51.0 (CH, 6-C), 75.2 (CH, 7-C), 96.6 (C, Car), 127.5 (CH, 2-C), 128.9 (CH, Car), 129.1 (CH, Car), 130.3 (CH, Car), 139.3 (CH, Car), 144.8 (C, Car), 150.2 (CH, 3-C), 197.8 (C, 1-C); *m*/z (CI) 443 (MH+, 12%), 385 (100), 347 (40), 311 (9), 183 (47), 153 (37), 75 (15); C19H28IO2Si [MH+] *required* 443.0903, found 443.0887.

*anti*-Isomer:H (500 MHz; CDCl3) -0.30 (3H, s, SiC*H*3), 0.00 (3H, s, SiC*H*3), 0.72 (9H, s, SiC(C*H*3)3), 1.70 (2H, m, 5-H), 2.19 (1H, m, 4-H), 2.53 (1H, m, 4-H), 2.63 (1H, m, 6-H), 5.06 (1H, d, *J* 6.8 Hz, 7-H), 5.92 (1H, dt, *J* 2.1 and 10.1 Hz, 2-H), 6.78 (1H, m, 3-H), 6.86 (1H, m, Har), 7.27 (1H, m, Har), 7.45 (1H, dd, *J* 1.8 and 7.9 Hz, Har), 7.68 (1H, dd, *J* 1.2 and 7.9 Hz, Har). C (125 MHz; CDCl3) -4.9 (CH3, Si*C*H3), -4.5 (CH3, Si*C*H3), 17.9 (C, Si*C*(CH3)3), 24.8 (CH2, 5-C), 25.7 (CH2, 4-C), 25.9 (CH3, SiC(*C*H3)3), 53.7 (CH, 6-C), 78.1 (CH, 7-C), 98.2 (C, Car), 128.7 (CH, 2-C), 128.9 (CH, Car), 129.0 (CH, Car), 132.2 (CH, Car), 139.2 (CH, Car), 148.4 (C, Car), 151.7 (CH, 3-C), 198.7 (C, 1-C); *m*/z (CI) 443 (MH+, 2%), 385 (100), 347 (35), 183 (41), 153 (46), 75 (14); C19H28IO2Si [MH+] *required* 443.0903, found 443.0902.

***syn*-6-[(3-Bromo-6-methoxy-2-pyridinyl)-*tert*-butyldimethylsilyloxymethyl]cyclohex-2-enone (*syn*-10).**

*syn*-6-[(3-Bromo-6-methoxypyridin-2-yl)-hydroxymethyl]-cyclohex-2-enone ***syn*-8** (0.65 g, 2.18 mmol) with TBSOTf (0.70 mL, 3.06 mmol) and Et3N (0.32 mL, 2.29 mmol) in dry THF (14 mL) afforded after flash chromatography (5-20% diethyl ether-petroleum ether solvent gradient), the *syn*-silyl ether as a colourless oil (0.78 g, 84%).

The reaction was quenched with a saturated aqueous solution of ammonium chloride in order to prevent the formation of a pyridyl-methanol complex.

max/cm-1 2950, 1681, 1577, 1461; H (250 MHz; CDCl3) -0.20 (3H, s, SiC*H*3), 0.01 (3H, s, SiC*H*3), 0.83 (9H, s, SiC(C*H*3)3), 2.19 (3H, m, 4-H and 5-H), 2.50 (1H, m, 4-H), 2.70 (1H, m, 6-H), 3.92 (3H, s, OC*H*3), 5.79 (1H, d, *J* 3.9 Hz, 7-H), 6.03 (1H, ddd, *J* 1.4, 2.3 and 10.0 Hz, 2-H), 6.52 (1H, d, *J* 8.6 Hz, 5’-H), 6.96 (1H, m, 3-H), 7.60 (1H, d, *J* 8.6 Hz, 4’-H); C (62.5 MHz; CDCl3) -5.4 (CH3, Si*C*H3), -4.8 (CH3, Si*C*H3), 18.1 (C, Si*C*(CH3)3), 22.2 (CH2, 5-C), 25.3 (CH2, 4-C), 25.7 (CH3, SiC(*C*H3)3), 51.4 (CH, 6-C), 53.6 (CH3, O*C*H3), 70.6 (CH, 7-C), 109.9 (C, 3’-C), 111.0 (CH, 5’-C), 130.2 (CH, 2-C), 142.5 (CH, 4-C), 150.4 (CH, 3-C), 156.4 (C, 2’-C), 162.3 (C, 6’-C), 198.7 (C, 1-C); *m*/z (CI) 428 (MH+, 100%), 370 (97), 294 (27), 75 (31); C19H29BrNO3Si [MH+ and 81Br] *required* 428.1080, found 428.1086.

***anti*-6-[(3-Bromo-6-methoxy-2-pyridin-2-yl)-*tert*-butyldimethylsilyloxymethyl]-cyclohex-2-enone (*anti*-10).**

*anti*-6-[(3-Bromo-6-methoxypyridin-2-yl)-hydroxymethyl]-cyclohex-2-enone ***anti*-8** (0.80 g, 2.70 mmol) with TBSOTf (0.87 mL, 3.78 mmol) and Et3N (0.39 mL, 2.83 mmol) in dry THF (26 mL) produced after flash chromatography (5-10% diethyl ether-petroleum ether solvent gradient), the *anti*-silyl ether as a white solid (0.88 g, 77%).

The reaction was quenched with a saturated aqueous solution of ammonium chloride in order to prevent the formation of a pyridyl-methanol complex.

mp 84-87C (CHCl3); max/cm-1 2928, 1681, 1577, 1460, 1416. H (250 MHz; CDCl3) -0.18 (3H, s, SiC*H*3), -0.01 (3H, s, SiC*H*3), 0.76 (9H, s, SiC(C*H*3)3), 1.62 (1H, m, 5-H), 1.86 (1H, m, 5-H), 2.27 (1H, m, 4-H), 2.56 (1H, m, 4-H), 3.12 (1H, m, 6-H), 3.89 (3H, s, OC*H*3), 5.43 (1H, d, *J* 8.9 Hz, 7-H), 5.99 (1H, dt, *J* 2.0 and 10.1 Hz, 2-H), 6.53 (1H, d, *J* 8.6 Hz, 5’-H), 6.87 (1H, dt, *J* 3.9 and 10.1 Hz, 3-H), 7.62 (1H, d, *J* 8.6 Hz, 4’-H); C (62.5 MHz; CDCl3) -5.4 (CH3, Si*C*H3), -4.9 (CH3, Si*C*H3), 18.1 (C, Si*C*(CH3)3), 24.4 (CH2, 5-C), 24.6 (CH2, 4-C), 25.6 (CH3, SiC(*C*H3)3), 52.6 (CH, 6-C), 53.9 (CH3, O*C*H3), 72.3 (CH, 7-C), 111.2 (C, 3’-C), 112.0 (CH, 5’-C), 129.4 (CH, 2-C), 142.8 (CH, 4’-C), 148.5 (CH, 3-C), 155.2 (C, 2’-C), 162.7 (C, 6’-C), 199.9 (C, 1-C); *m*/z (CI) 428 (MH+, 99%), 370 (100), 296 (19); C19H29BrNO3Si [MH+ and 81Br] *required* 428.1080, found 428.1099.

**2-[(2-Bromophenyl)methyl]cyclohexanone (19)**

2-Bromobenzyl bromide (15.4 g, 0.062 mol), with a solution of LDA [Diisopropylamine (9.30 mL, 0.066 mol), *n*-BuLi (26.5 mL 2.5M in hexane, 0.066 mol)] and cyclohexanone (6.40 mL, 0.062 mol) in THF (120 mL) and DMPU (16.4 mL, 0.136 mol) yielded after flash chromatography (Et2O/Pet. Ether) the pure ketone as a colourless oil (13.7 g, 83 %).

max/cm-1 2934, 2861, 1713, 1470, 1445, 1128, 1022, 749; δH (500 MHz; CDCl3) 1.43 (1H, m, 3-H), 1.63 (2H, m, 5-H and 4-H), 1.83 (1H, m, 4-H), 2.06 (2H, m, 5-H and 3-H), 2.33 (1H, m, 6-H), 2.41 (1H, m, 6-H), 2.56 (1H, dd, *J* 8.1 and 13.9 Hz, 7-H), 2.70 (1H, m, 2-H), 3.33 (1H, dd, *J* 5.4 and 13.9 Hz, 7-H), 7.52 (1H, m, Harom), 7.21 (2H, m, Harom), 7.05 (1H, m, Harom); δC (125 MHz, CDCl3) 25.3 (CH2, 4-C), 28.1 (CH2, 5-C), 33.7 (CH2, 3-C), 35.7 (CH2, 7-C), 42.2 (CH2, 6-C), 50.6 (CH, 2-C), 124.7 (C, Carom) 127.2, 127.8, 131.8, 132.8 (CH, Carom), 149.8 (C, Carom), 212.1 (C, 1-C); *m/z*(EI) 138(100%), 94(60), 79(58), 67(68), 44(92), 42(81), 39(60), 28(57); C13H15BrO [M+, 81Br] *required* 266.0306, found 266.0296.

**6-[(2-(Bromophenyl)methyl]-2-phenylseleno-cyclohexanone (20)**

Phenylselenyl chloride (7.78 g, 0.046 mol) with a solution of LDA (22.5 mL, 2.0 M solution in hexane, 0.045 mol) and 2-[(2-bromophenyl)methyl]cyclohexanone(10.0 g, 0.037 mol) in THF (180 mL) and DMPU (11.2 mL, 0.093 mol) yielded after chromatography the *syn*-isomer as a light yellow oil (5.32 g, 34.0 %) and the *anti*-isomer as a light yellow oil (8.08 g, 51 %).

*syn*-Isomer: max/cm-1 3056, 2934, 2859, 1702, 1578, 1473, 1439, 1299, 1125, 1063, 1023, 742, 692; δH (500 MHz; CDCl3) 1.46-1.59 (1H, m, 4-H and 5-H), 1.81-89 (2H, m, 3-H, 4-H), 2.07 (1H, m, 5-H), 2.28 (1H, m, 3-H), 2.63 (1H, dd, *J* 7.5 and 13.9 Hz, 7-H), 2.82 (1H, m, 6-H), 3.36 (1H, dd, *J* 5.7 and 13.9 Hz, 7-H), 4.05 (1H, dd, *J* 5.7 and 13.9 Hz, 2-H), 7.06 (1H, m, Harom), 7.25 (5H, m, Harom), 7.55 (3H, m, Harom); δC (75 MHz, CDCl3) 26.3 (CH2, 4-C), 34.2 (CH2, 5-C), 36.0 (CH2, 3-C), 37.5 (CH2, 7-C), 51.1 (CH, 2-C), 54.1 (CH, 6-C), 124.7-139.4 (12 x Carom), 208 (C, 1-C); *m/z*(EI) 422(44%), 313(70), 185(87), 171(94), 169(95), 157(90), 77(100); C19H19BrOSe[M+, 80Se, 79Br] *requires* 421.9784, found 421.9764.

*anti*-Isomer: max/cm-1 3058, 2933, 2858, 1703, 1579, 1471, 1439, 1296, 1224, 1022, 922, 870, 740, 691, 660; δH (500 MHz; CDCl3) 1.40 (1H, m, 3-H), 1.75 (1H, m, 4-H), 1.88 (1H, m, 4-H), 2.10 (1H, m, 3-H), 2.21 (1H, m, 5-H), 2.28 (1H, m, 5-H), 2.53 (1H, dd, *J* 8.2 and 14.0 Hz, 7-H), 3.32 (1H, dd, *J* 5.3 and 14.0 Hz, 7-H), 3.62 (1H, m, 6-H), 3.93 (1H, m, 2-H), 7.06 (1H, m, Harom), 7.22 (5H, m, Harom), 7.43 (2H, m, Harom), 7.53 (1H, m, Harom); δC (75 MHz, CDCl3) 22.5 (CH2, 4-C), 33.7 (CH2, 5-C), 34.1 (CH2, 3-C), 36.0 (CH2, 7-C), 45.7 (CH, 6-C), 51.4 (CH, 2-C), 125.1 (C, Carom), 127.6-135.0 (9 x Carom), 140.1 (C, Carom), 209.0 (C, 1-C); *m/z*(EI) 421(24%), 342(23), 185(76), 169(100), 157(58), 115(64), 91(59), 77(73), 55(69), 41(70); C19H19BrOSe [M+, 80Se, 79Br] *required* 421.9784, found 421.9778.

**6-[(2-Bromophenyl)methyl]cyclohexenone (21)**

6-[(2-(Bromophenyl)methyl]-2-phenylseleno-cyclohexanone(0.53 g, 1.26 mmol) dissolved in methanol (200 mL) with sodium periodate (0.31 g, 1.45 mmol) in a minimum water yielded after work up and chromatography the pure α,β unsaturated ketone as an orange oil (2.65 g, 78 %).

max/cm-1 2925, 1677, 1471, 1440, 1387, 1220, 1127, 1022, 791, 769, 745;δH (500 MHz; CDCl3) 1.75 (1H, m, 5-H), 1.96 (1H, m, 5-H), 2.33 (2H, m, 4-H), 2.62 (1H, m, 7-H), 2.70 (1H, m, 6-H), 3.54 (1H, dd, *J* 4.4 and 13.8 Hz, 7-H), 6.04 (1H, ddd, *J* 1.3, 2.7 and 10.0 Hz, 2-H), 6.94 (1H, m, 3-H), 7.07 (1H, m, Harom), 7.22 (2H, m, Harom), 7.53 (1H, m, Harom); δC (75 MHz, CDCl3) 25.7 (CH2, 4-C), 27.5 (CH2, 5-C), 35.6 (CH2, 7-C), 46.9 (CH, 6-C), 124.8 (C, Carom), 127.3 (CH, Carom), 127.9 (CH, Carom), 129.5 (CH, 2-C), 131.6 (CH, Carom), 132.9 (CH, Carom), 139.5 (C, Carom), 149.7 (CH, 3-C), 200.4 (C, 1-C); *m/z*(EI) 268(66%), 266(67), 171(87), 169(61), 157(59) 128(84), 115(88), 102(75), 95(85), 90(83), 77(78), 63(76), 65(76), 55(80), 41(80), 30(100); C13H13BrO [M+, 79Br] *required* 264.0150, found 264.0156; CHN analysis required C: 58.9 H: 4.94, found C: 58.8 H: 4.87.

**6-(2-bromobenzyl)cyclohex-2-en-1-ol (29)**

6-[(2-Bromophenyl)methyl]cyclohexenone (1.72 g, 6.48 mmol) in dichloromethane /methanol (50 mL/ 50 mL) with sodium borohydride (0.25 g, 6.68 mmol) and cerium (III) chloride heptahydrate (0.25 g, 6.68 mmol) yielded after work up and chromatography the *syn*-alcohol as an orange oil (0.75 g, 43 %) and the *anti*-alcohol as an orange oil (0.75 g, 43 %); max/cm-1 3402, 2922, 1471, 1433, 1055, 1023, 909, 738; CHN analysis required C 58.44, H 5.66, found C 58.40, H 5.67.

*syn*-Isomer: δH (400 MHz; CDCl3) 1.53 (2H, m, 5-H), 2.00 (2H, m, 4-H, 6-H), 2.13 (2H, m, 4-H), 2.74 (1H, dd, *J* 7.2 and 13.6 Hz, 7-H), 2.99 (1H, dd, *J* 7.2 and 13.6 Hz, 7-H), 3.35 (1H, ap s, 1-H), 5.87 (2H, AB dd, *J* 11.6 and 14.0 Hz, 2-H and 3-H), 7.07 (1H, m, Harom), 7.23 (1H, m, Harom), 7.30 (1H, m, Harom), 7.40 (1H, m, Harom); δC (100 MHz, CDCl3) 22.2 (CH2, 5-C), 26.0 (CH2, 4-C), 38.2 (CH2, 7-C), 39.7 (CH, 6-C), 65.4 (CH, 1-C), 125.0 (C, Carom), 127.2 (CH, Carom), 127.7 (CH, Carom), 128.7 (CH, 3-C), 131.6 (CH, 2-C), 131.7 (CH, Carom), 132.9 (CH, Carom) 140.3 (C, Carom); C13H15BrO [M+, 79Br] *required* 266.0306, found 266.0304.

*anti*-Isomer: δH (400 MHz; CDCl3) 1.38 (1H, m, 5-H), 1.72 (1H, m, 5-H), 1.91 (1H, m, 6-H), 2.00 (2H, m, 4-H), 2.56 (1H, dd, *J* 9.3 and 13.6 Hz, 7-H), 3.23 (1H, dd, *J* 4.8 and 13.6 Hz, 7-H), 3.99 (1H, m, 1-H), 5.70 (1H, m, 2-H), 5.78 (1H, m, 3-H), 7.06 (1H, m, Harom), 7.22 (2H, m, Harom), 7.55 (1H, m, Harom); δC (100 MHz, CDCl3) 24.5 (CH2, 4-C), 24.9 (CH2, 5-C), 38.8 (CH2, 7-C), 42.7 (CH, 6-C), 71.4 (CH, 1-C), 125.0 (C, Carom), 127.2 (CH, Carom), 127.7 (CH, Carom), 129.8 (CH, 3-C), 130.0 (CH, 2-C), 131.5 (CH, Carom), 133.0 (CH, Carom) 140.1 (C, Carom); C13H15BrO [M+, 79Br] *required* 266.0306, found 266.0293.

**8-(*tert*-Butyldimethylsilyloxy)-tricyclo[7.3.1.02,7]trideca-2(7),3,5,11-tetraen-13-one (11a).**

Colourless oil; max/cm-1 2954, 1727,1472, 1361; H (250 MHz; CDCl3) 0.00 (3H, s, SiC*H*3), 0.06 (3H, s, SiC*H*3), 0.78 (9H, s, SiC(C*H*3)3), 2.60 (1H, m, 10-H), 2.85 (1H, m, 10-H), 2.88 (1H, m, 9-H), 3.75 (1H, d, *J* 6.6 Hz, 1-H), 5.08 (1H, d, *J* 1.7 Hz, 8-H), 5.56 (1H, m, 11-H), 5.91 (1H, m, 12-H), 7.04 (1H, m, 6-H), 7.22 (2H, m, 4-H and 5-H), 7.34 (1H, m, 3-H); C (62.5 MHz; CDCl3) -4.8 (CH3, Si*C*H3), -4.3 (CH3, Si*C*H3), 18.0 (C, Si*C*(CH3)3), 24.8 (CH3, SiC(*C*H3)3), 34.6 (CH2, 10-C), 51.7 (CH, 1-C), 53.0 (CH, 9-C), 79.8 (CH, 8-C), 125.5 (CH, 11-C), 127.0 (CH, 5-C), 127.3 (CH, 6-C), 128.6 (CH, 4-C), 129.6 (CH, 3-C), 131.6 (CH, 12-C), 136.2 (C, 2-C), 139.1 (C, 7-C), 209.7 (C, 13-C); *m*/z (CI) 315 (MH+, 9%), 257 (100), 239 (24), 200 (10), 183 (95), 155 (23), 128 (13), 75 (25). C19H27O2Si [MH+] *required* 315.1780, found 315.1786.

**8-(*tert*-Butyldimethylsilyloxy)-tricyclo[7.2.2.02,7]trideca-2(7),3,5-trien-10-one (12a).**

White solid; mp 77-79C. (Found C 71.7, H 8.7; C19H28O2Si requires C 72.1, H 8.9%). max/cm-1 2928, 1724, 1471. H (250 MHz; CDCl3) 0.00 (3H, s, SiC*H*3), 0.04 (3H, s, SiC*H*3), 0.70 (9H, s, SiC(C*H*3)3), 1.50 (1H, m, 12-H), 1.65 (2H, m, 12-H and 13-H), 1.90 (1H, m, 13-H), 2.47 (1H, m, 11-H), 2.53 (1H, m, 11-H), 2.85 (1H, m, 9-H), 3.13 (1H, m, 1-H), 4.79 (1H, d, *J* 7.0 Hz, 8-H), 7.00 (1H, m, 3-H), 7.14 (3H, m, 4-H, 5-H and 6-H); C (62.5 MHz; CDCl3) -4.4 (CH3, Si*C*H3), -4.2 (CH3, Si*C*H3), 17.9 (C, Si*C*(CH3)3), 21.0 (CH2, 12-C), 25.7 (CH3, SiC(*C*H3)3), 26.0 (CH2, 13-C), 40.0 (CH, 1-C), 46.4 (CH2, 11-C), 53.6 (CH, 9-C), 76.3 (CH, 8-C), 127.1 (CH, 4-C), 128.1 (CH, 3-C), 128.7 (CH, 5-C), 132.0 (CH, 6-C), 138.3 (C, 2-C), 142.5 (C, 7-C), 213.4 (C, 10-C); *m*/z (CI) 317 (MH+, 4%), 259 (45), 202 (10), 185 (100), 131 (54), 100 (9), 69 (26); C19H29O2Si [MH+] *required* 317.1937, found 317.1929.

**Tricyclo[7.2.2.02,7]trideca-2(7),3,5-trien-10-one (22)**

max/cm-1 2938, 1718, 1492, 1450, 1097, 952, 761, 731; δH (400 MHz; CDCl3) 2.01 (1H, m, 13-H), 2.11 (2H, m, 12-H and 13-H), 2.66 (2H, m, 11-H) 2.78 (1H, m, 9-H), 3.14 (1H, m, 8-H), 3.19 (1H, d, *J* 4.2 Hz, 1-H), 3.34 (1H, ddd, *J* 1.3, 4.2 and 17.5 Hz, 8-H), 7.09 (4H, m, Harom); δC (100 MHz, CDCl3) 24.3 (CH2, 13-C), 27.3 (CH2, 12-C), 38.4 (CH, C-1), 38.6 (CH2, 8-C), 46.3 (CH2, 11-C), 46.5, CH, 9-C), 126.2 (CH, Carom), 126.7 (CH, Carom), 128.8 (CH, Carom), 130.6 (CH, Carom), 135.4 (C, Carom), 144.3 (C, Carom), 215.3 (C, 10-C); *m/z*(EI)186(91%), 157(90), 143(95), 127(90), 117(91), 91(92), 77(93), 63(45), 51(92), 42(100), 39(95), 32(90), 28(94)*;* C13H14O *required* 186.1044, found 186.1034; CHN analysis found C 83.38, H 7.42 required C 83.83, H 7.58 %.

**Tricyclo[7.3.1.02,7]trideca-2(7),3,5,11-tetraen-13-one (23)**

Yellow oil; max/cm-1 3031, 2924, 1717, 1650, 1486, 1439, 1120, 1029, 749; δH (400 MHz; CDCl3) 2.60 (1H, m, 10-H), 2.89 (1H, m, 10-H), 2.94 (1H, m, 9-H), 3.23 (1H, d, *J* 17.6 Hz, 8-H), 3.55 (1H, dd, *J* 4.2 and 17.6 Hz, 8-H), 3.73 (1H, d, *J* 5.8 Hz, 1-H), 5.73 (1H, m, 11-H), 5.88 (1H, m, 12-H), 7.05 (1H, m, Harom), 7.16 (4H, m, Harom); δC (125 MHz, CDCl3) 39.7 (CH, 10-C), 39.9 (CH2, 8-C), 42.5 (CH, 9-C), 52.4 (CH, 1-C), 125.6 (CH, 11-C), 126.7 (CH, Carom), 127.0 (CH, Carom), 127.6 (CH, Carom), 128.5 (CH, Carom), 131.2 (CH, 12-C), 134.2 (C, Carom), 139.5 (C, Carom), 212.1 (C, 13-C); *m/z*(EI)185(90%), 157(85), 141(70), 127(73), 116(100), 39(84);C13H12O *required* 184.0888, found 184.0882.

**Tricyclo[7.3.1.02,7]trideca-2(7),3,5,10-tetraen-13-one (24)**

max/cm-1 3030, 2920, 1715, 1649, 1481, 1439, 1123, 1031, 750; δH (400 MHz; CDCl3) 2.64 (1H, ddd, *J* 1.8, 4.8 Hz and 17.5 Hz, 10-H), 2.98 (1H, d, *J* 17.5 Hz, 10-H), 3.11 (1H, ap s, 1-H), 3.20 (1H, dd, *J* 1.5 and 16.7 Hz, 2-H), 3.36 (1H, dd, *J* 16.7 and 5.1 Hz, 2-H), 3.54 (1H, d, *J* 5.1 Hz, 9-H), 5.65 (1H, m, 11-H), 5.73 (1H, m, 10-H), 7.08 (1H, m, Harom), 7.13 (1H, m, Harom), 7.20 (2H, m, Harom); δC (75 MHz, CDCl3) 38.8 (CH2, 8-C), 40.8 (CH2, 12-C), 46.6 (CH, 9-C), 50.0 (CH, 1-C), 125.6 (CH, 11-C), 126.9 (CH, Carom), 127.1 (CH, Carom), 128.5 (CH, Carom), 128.5 (CH, Carom), 129.9 (C, 10-C), 133.1 (C, Carom), 140.4 (C, Carom), 212.6 (C, 13-C); *m/z*(EI)184(75%), 156(80), 141(86), 128(100), 115(88), 77(55), 63(63), 51(62), 39(69), 27(67); C13H12O *required* 184.0888, found 184.0883.

**(13R)-Tricyclo[7.3.1.02,7]trideca-2(7),3,5,11-tetraen-13-ol (31)**

White solid; mp 69-70°C; max/cm-1 3339, 3025, 2900, 2832, 1472, 1440, 1070, 957, 739, 637; δH (500 MHz; CDCl3) 1.65 (1H, d, *J* 5.9 Hz, 14-H), 2.14 (1H, ddd, *J* 1.2, 4.5 and 18.2 Hz, 10-H), 2.40 (1H, m, 9-H) 2.55-2.61 (2H, m, 8-H and 10-H), 3.29 (1H, dd, *J* 8.3 and 18.4 Hz, 8-H), 3.35 (1H, m, 1-H), 4.17 (1H, m, 13-H), 5.54 (1H, m, 11-H), 5.78 (1H, m, 12-H), 7.08 (4H, m, Harom); δC (125 MHz, CDCl3) 32.4 (CH, 9-C), 32.6 (CH2, 8-C), 36.1 (CH2, 10-C), 43.3 (CH, 1-C), 69.4 (CH, 13-C), 125.0 (CH, 11-C), 126.0 (CH, Carom), 126.3 (CH, Carom), 129.1 (CH, Carom), 129.2 (CH, Carom), 130.8 (CH, 12-C), 135.3 (C, Carom), 137.1 (C, Carom); *m/z*(EI)186(32%), 168(100), 153(41), 129(33), 115(25); C13H14O *required* 186.1045, found 186.1054; CHN analysis found C 84.05, H 7.76 required C 83.83, H 7.58 %.

**(13S)-Tricyclo[7.3.1.02,7]trideca-2(7),3,5,11-tetraen-13-ol (32)**

White solid; 63-65°C; max/cm-1 3307, 3018, 2906, 1654, 1488, 1450, 1451, 1437, 1053, 740, 723, 688; δH (400 MHz; CDCl3) 1.59 (1H, dd, *J* 4.2 and 18.7 Hz, 10-H), 2.21 (1H, m, 9-H), 2.44 (1H, m, 10-H), 2.50 (1H, d, *J* 17.9 Hz, 8-H), 2.97 (1H, dd, *J* 7.9 and 17.9 Hz, 8-H), 3.11 (1H, m, 1-H), 3.94 (1H, m, 13-H), 5.50 (1H, m, 11-H), 5.66 (1H, m, 12-H), 6.85 (1H, m, Harom), 6.92 (1H, m, Harom), 6.98 (2H, m, Harom); δC (125 MHz, CDCl3) 30.2 (CH2, 10-C), 31.7 (CH, 9-C), 37.9 (CH2, 8-C), 42.6 (CH, 1-C), 68.7 (CH, 13-C), 125.7 (CH, Carom), 126.2 (CH, Carom), 126.4 (CH, Carom), 127.7 (CH, 11-C), 128.6 (CH, 12-C), 129.2 (CH, Carom), 134.4 (C, Carom), 140.4 (C, Carom); *m/z*(EI) 186(66%), 158(100), 153(75), 127(72), 128(72), 115(74); C13H14O *required* 186.1045, found 186.1036; CHN analysis found C 83.67, H 7.52 required C 83.83, H 7.58 %.

**Tricyclo[7.3.1.02,7]trideca-2(7),3,5,10-tetraene (33)**

Yellow oil; δH (500 MHz; CDCl3) 1.85 (2H, m, 12-H), 1.89 (1H, m, 13-H), 2.06 (1H, m, 13-H), 2.65 (1H, m, 9-H), 3.02 (2H, m, 8-H), 3.25 (1H, m, 1-H), 6.13 (1H, ap t, *J* 8.0 Hz, 10-H), 6.43 (1H, ap t, *J* 8.0 Hz, 11-H), 7.01 (2H, m, Harom), 7.30 (3H, m, Harom); δC (125 MHz, CDCl3) 25.9 (CH2, 12-C), 30.9 (CH2, 13-C), 31.2 (C, 9-C), 38.3 (CH2, 8-C), 41.2 (CH, 1-C), 125.3 (CH, Carom), 125.9 (CH, Carom), 127.1 (CH, Carom), 131.1 (C, 11-C), 131.6 (CH, Carom), 133.9 (C, Carom), 135.9 (C, 10-C), 143.2 (C, Carom).
